# Supplementary material
Source: PubMed Central journal article supplement (PMC1622839)

Apo WT: F42↑ V69↑

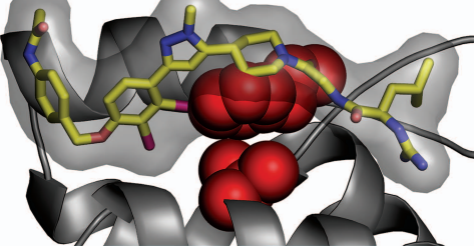

Bound WT: F42↓ V69↓

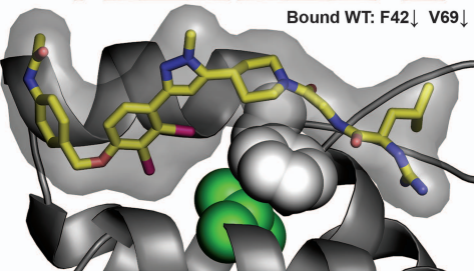

Bound V69A: F42↓

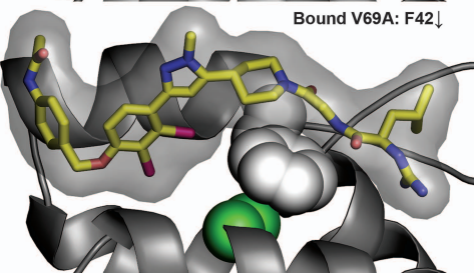

Supplement: pnas_0607058103_1.pdf [file pnas_0607058103_1.pdf]
